# Supplementary material for: Shift work is associated with 10-year incidence of atrial fibrillation in younger but not older individuals from the general population: results from the Tromsø Study
Source: HighWire-hosted journal article supplement (doi:10.1136/openhrt-2022-002086), 2022-09-01
Supplement: openhrt-2022-002086supp001_data_supplement.pdf [file openhrt-2022-002086supp001_data_supplement.pdf]

Supplementary data

Shift work is associated with 10-year incidence of atrial fibrillation in younger but not older individuals from the general population: results from the Tromsø Study

Victor W. Zwartkruis, Ekaterina Sharashova, Tom Wilsgaard, Rudolf A. De Boer, Maja-Lisa Løchen, Michiel Rienstra

Contents

Table S1 ..... 2

Figure S1a ..... 3

Figure S1b ..... 3

Table S2a ..... 4

Table S2b ..... 5

Table S3 ..... 6

Table S4 ..... 7

Table S5 ..... 8

Table S6 ..... 9

Table S7 ..... 10

**Table S1: Hazard ratios for the association between shift work and 10-year incidence of atrial fibrillation in the total study population. The Tromsø Study**

| Hazard ratio (95% confidence interval)                                                              | p-value |
|-----------------------------------------------------------------------------------------------------|---------|
| <i>Model 1: unadjusted</i>                                                                          |         |
| 0.91 (0.59-1.42)                                                                                    | 0.688   |
| <i>Model 2: adjusted for age and sex</i>                                                            |         |
| 1.17 (0.76-1.81)                                                                                    | 0.480   |
| <i>Model 3: adjusted for age, sex, and CHARGE-AF risk model</i>                                     |         |
| 1.13 (0.72-1.75)                                                                                    | 0.597   |
| <i>Model 4: adjusted for age, sex, CHARGE-AF risk model, education level, and physical activity</i> |         |
| 1.13 (0.72-1.77)                                                                                    | 0.590   |

Hazard ratios and p-values represent the association between shift work and 10-year incident AF (number of AF cases = 129) in the total study population (n = 22 339). Components of the CHARGE-AF risk model were weight, height, systolic and diastolic blood pressure, antihypertensive drug use, diabetes, smoking, and history of myocardial infarction. AF, atrial fibrillation.

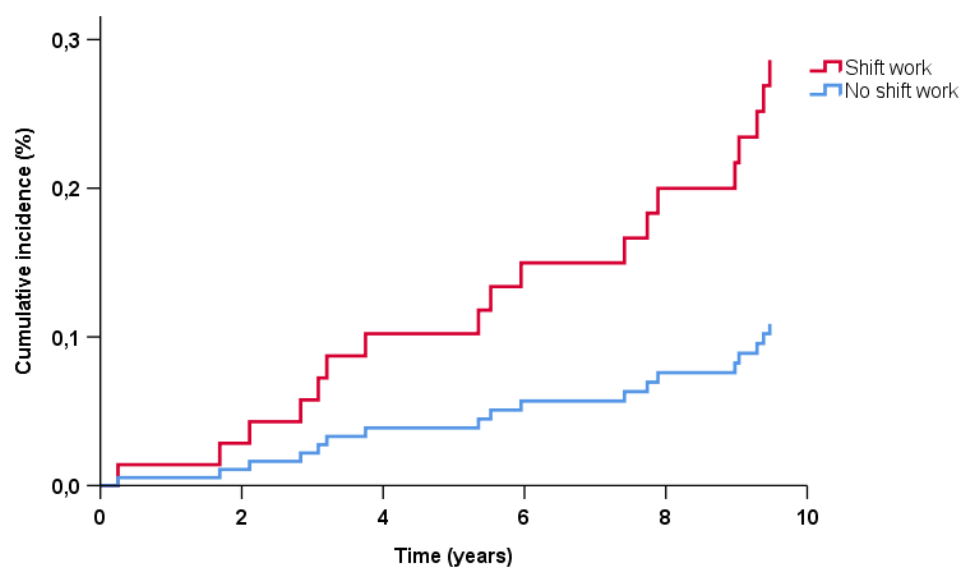

**Figure S1a:** Propensity score-adjusted Kaplan-Meier cumulative incidence plot for incident atrial fibrillation in participants <40 years with and without shift work

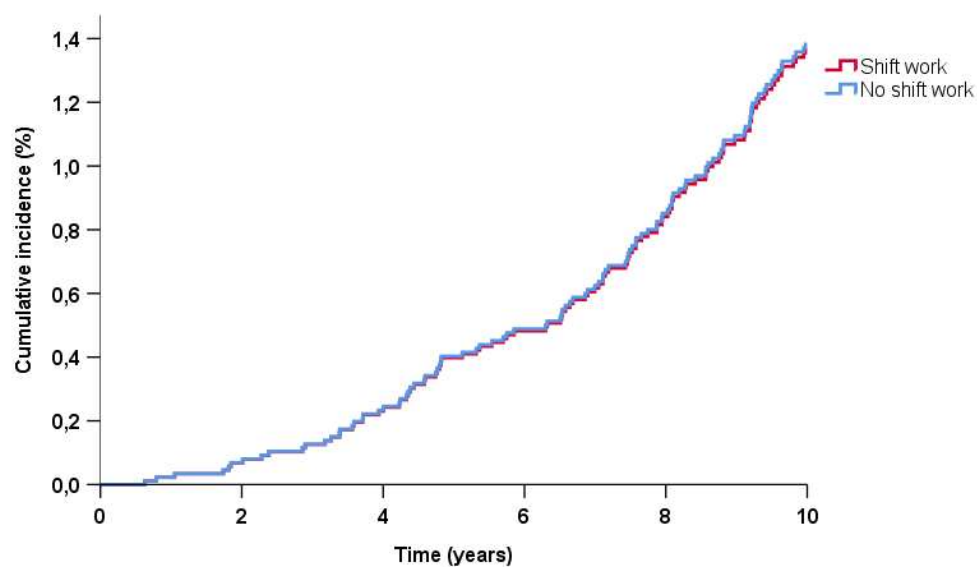

**Figure S1b:** Propensity score-adjusted Kaplan-Meier cumulative incidence plot for incident atrial fibrillation in participants  $\geq 40$  years with and without shift work

**Table S2a: Clinical characteristics of participants <40 years with and without shift work. The Tromsø Study**

| Characteristic             | Shift work      |                | p-value |
|----------------------------|-----------------|----------------|---------|
|                            | No (n = 10 491) | Yes (n = 3220) |         |
| Age (years)                | 30.7 ± 5.3      | 30.3 ± 5.0     | <0.001  |
| Female sex                 | 5271 (50%)      | 1680 (52%)     | 0.055   |
| BMI (kg/m <sup>2</sup> )   | 23.5 ± 3.2      | 23.8 ± 3.5     | <0.001  |
| Overweight                 | 2393 (23%)      | 779 (24%)      | 0.106   |
| Obesity                    | 434 (4%)        | 186 (6%)       | <0.001  |
| SBP (mmHg)                 | 125.0 ± 12.9    | 123.8 ± 12.7   | <0.001  |
| DBP (mmHg)                 | 72.6 ± 9.4      | 71.6 ± 9.3     | <0.001  |
| Antihypertensive drug use  | 52 (0.5%)       | 10 (0.3%)      | 0.171   |
| Hypertension               | 1499 (14%)      | 369 (11%)      | <0.001  |
| Resting heart rate (bpm)   | 71.7 ± 13.1     | 71.5 ± 12.6    | 0.334   |
| Total cholesterol (mmol/L) | 5.3 ± 1.0       | 5.3 ± 1.1      | 0.035   |
| Diabetes                   | 31 (0.3%)       | 9 (0.3%)       | 0.882   |
| History of MI              | 3 (0.0%)        | 4 (0.1%)       | 0.057   |
| History of stroke          | 11 (0.1%)       | 4 (0.1%)       | 0.763   |
| Current smoking            | 4300 (41%)      | 1541 (48%)     | <0.001  |
| Sedentary lifestyle        | 2536 (24%)      | 840 (26%)      | 0.025   |
| Highly active lifestyle    | 2277 (22%)      | 613 (19%)      | 0.001   |
| Primary education only     | 1705 (16%)      | 640 (20%)      | <0.001  |
| Higher education           | 4929 (47%)      | 1299 (40%)     | <0.001  |

Data presented as mean ± standard deviation or count (%). P-values represent the difference between participants with and without shift work at baseline. Overweight was defined as BMI 25-30 kg/m<sup>2</sup>, obesity as BMI ≥ 30 kg/m<sup>2</sup>, and hypertension as SBP ≥ 140 mmHg and/or DBP ≥ 90 mmHg and/or use of antihypertensive drugs. BMI, body mass index; bpm, beats per minute; DBP, diastolic blood pressure; MI, myocardial infarction; SBP, systolic blood pressure.

**Table S2b: Clinical characteristics of participants  $\geq 40$  years with and without shift work. The Tromsø Study**

| Characteristic             | Shift work       |                  | p-value |
|----------------------------|------------------|------------------|---------|
|                            | No (n = 7132)    | Yes (n = 1496)   |         |
| Age (years)                | 47.3 $\pm$ 6.1   | 46.9 $\pm$ 5.9   | 0.019   |
| Female sex                 | 3273 (46%)       | 656 (44%)        | 0.149   |
| BMI (kg/m <sup>2</sup> )   | 25.0 $\pm$ 3.5   | 25.4 $\pm$ 3.8   | <0.001  |
| Overweight                 | 2660 (37%)       | 599 (40%)        | 0.049   |
| Obesity                    | 589 (8%)         | 160 (11%)        | 0.002   |
| SBP (mmHg)                 | 130.5 $\pm$ 16.8 | 130.1 $\pm$ 16.7 | 0.422   |
| DBP (mmHg)                 | 80.0 $\pm$ 10.7  | 79.4 $\pm$ 10.7  | 0.096   |
| Antihypertensive drug use  | 337 (5%)         | 66 (4%)          | 0.599   |
| Hypertension               | 2267 (32%)       | 461 (31%)        | 0.437   |
| Resting heart rate (bpm)   | 71.1 $\pm$ 13.4  | 71.4 $\pm$ 12.9  | 0.314   |
| Total cholesterol (mmol/L) | 6.1 $\pm$ 1.2    | 6.3 $\pm$ 1.3    | <0.001  |
| Diabetes                   | 65 (1%)          | 12 (1%)          | 0.678   |
| History of MI              | 77 (1%)          | 17 (1%)          | 0.854   |
| History of stroke          | 21 (0.3%)        | 1 (0.1%)         | 0.157   |
| Current smoking            | 2560 (36%)       | 679 (45%)        | <0.001  |
| Sedentary lifestyle        | 1698 (24%)       | 415 (28%)        | 0.001   |
| Highly active lifestyle    | 1232 (17%)       | 240 (16%)        | 0.255   |
| Primary education only     | 2621 (37%)       | 674 (45%)        | <0.001  |
| Higher education           | 1580 (36%)       | 356 (24%)        | <0.001  |

Data presented as mean  $\pm$  standard deviation or count (%). P-values represent the difference between participants with and without shift work at baseline. Overweight was defined as BMI 25-30 kg/m<sup>2</sup>, obesity as BMI  $\geq$  30 kg/m<sup>2</sup>, and hypertension as SBP  $\geq$  140 mmHg and/or DBP  $\geq$  90 mmHg and/or use of antihypertensive drugs. BMI, body mass index; bpm, beats per minute; DBP, diastolic blood pressure; MI, myocardial infarction; SBP, systolic blood pressure.

**Table S3: Hazard ratios for the association between shift work and 10-year incidence of atrial fibrillation, stratified by age category. The Tromsø Study**

| Determinant and age group                                                                           | HR (95% CI)      | p-value |
|-----------------------------------------------------------------------------------------------------|------------------|---------|
| <i>Model 1: unadjusted</i>                                                                          |                  |         |
| Age < 40 years                                                                                      | 2.65 (1.05-6.71) | 0.040   |
| Age 40-49 years                                                                                     | 1.07 (0.50-2.30) | 0.860   |
| Age 50-59 years                                                                                     | 0.98 (0.46-2.10) | 0.956   |
| Age 60-69 years                                                                                     | 0.33 (0.04-2.44) | 0.277   |
| <i>Model 2: adjusted for age and sex</i>                                                            |                  |         |
| Age < 40 years                                                                                      | 2.90 (1.14-7.34) | 0.025   |
| Age 40-49 years                                                                                     | 1.03 (0.48-2.22) | 0.940   |
| Age 50-59 years                                                                                     | 1.06 (0.50-2.28) | 0.874   |
| Age 60-69 years                                                                                     | 0.36 (0.05-2.70) | 0.321   |
| <i>Model 3: adjusted for age, sex, and CHARGE-AF risk model</i>                                     |                  |         |
| Age < 40 years                                                                                      | 2.90 (1.12-7.49) | 0.028   |
| Age 40-49 years                                                                                     | 0.99 (0.45-2.14) | 0.971   |
| Age 50-59 years                                                                                     | 1.01 (0.47-2.19) | 0.973   |
| Age 60-69 years                                                                                     | 0.43 (0.06-3.24) | 0.411   |
| <i>Model 4: adjusted for age, sex, CHARGE-AF risk model, education level, and physical activity</i> |                  |         |
| Age < 40 years                                                                                      | 2.64 (0.99-7.00) | 0.051   |
| Age 40-49 years                                                                                     | 0.97 (0.44-2.13) | 0.943   |
| Age 50-59 years                                                                                     | 1.07 (0.49-2.34) | 0.873   |
| Age 60-69 years                                                                                     | 0.44 (0.06-3.39) | 0.432   |

Hazard ratios and p-values represent the association between shift work and 10-year AF in participants aged <40 years ( $n = 13\,711$ , number of AF cases = 18, crude incidence = 0.1%), 40-49 years ( $n = 5818$ , number of AF cases = 44, crude incidence = 0.8%), 50-59 years ( $n = 2429$ , number of AF cases = 46, crude incidence = 1.9%), and 60-69 years ( $n = 378$ , number of AF cases = 21, crude incidence = 5.6%). Components of the CHARGE-AF risk model were weight, height, systolic and diastolic blood pressure, antihypertensive drug use, diabetes, smoking, and history of myocardial infarction. AF, atrial fibrillation; CI, confidence interval; HR, hazard ratio.

**Table S4: Propensity score-adjusted hazard ratios for the association between shift work and 10-year incidence of atrial fibrillation, stratified by age. The Tromsø Study**

| Determinant and age group                                                               | HR (95% CI)      | p-value |
|-----------------------------------------------------------------------------------------|------------------|---------|
| <i>Model 1: unadjusted</i>                                                              |                  |         |
| Shift work (age < 40 years)                                                             | 2.65 (1.05-6.71) | 0.040   |
| Shift work (age ≥ 40 years)                                                             | 0.87 (0.52-1.46) | 0.601   |
| <i>Model 2: adjusted for propensity score</i>                                           |                  |         |
| Shift work (age < 40 years)                                                             | 2.64 (1.03-6.74) | 0.043   |
| Shift work (age ≥ 40 years)                                                             | 0.99 (0.57-1.66) | 0.962   |
| <i>Model 3: adjusted for propensity score and additionally adjusted for age and sex</i> |                  |         |
| Shift work (age < 40 years)                                                             | 2.59 (1.00-6.73) | 0.050   |
| Shift work (age ≥ 40 years)                                                             | 0.92 (0.54-1.55) | 0.754   |

Hazard ratios and p-values represent the association between shift work and 10-year AF in participants aged <40 years ( $n = 13\,711$ , number of AF cases = 18, crude incidence = 0.1%) or participants aged ≥40 years ( $n = 8628$ , number of AF cases = 111, crude incidence = 1.3%). The propensity score was calculated using relevant clinical characteristics as included in Table 1 (age, sex, weight, height, systolic and diastolic blood pressure, antihypertensive drug use, resting heart rate, total cholesterol, diabetes, history of myocardial infarction, history of stroke, smoking, physical activity, and education level). AF, atrial fibrillation; CI, confidence interval; HR, hazard ratio.

**Table S5: Hazard ratios for the association between shift work status at the 1<sup>st</sup> and 2<sup>nd</sup> attended survey and 10-year incidence of atrial fibrillation. The Tromsø Study**

| Determinant                                                                                         | HR (95% CI)      | p-value |
|-----------------------------------------------------------------------------------------------------|------------------|---------|
| <i>Model 1: unadjusted</i>                                                                          |                  |         |
| No shift work at either survey                                                                      | Ref.             | Ref.    |
| Shift work at 1 <sup>st</sup> survey only                                                           | 0.81 (0.41-1.60) | 0.550   |
| Shift work at 2 <sup>nd</sup> survey only                                                           | 0.45 (0.21-0.96) | 0.039   |
| Shift work at both surveys                                                                          | 0.65 (0.38-1.11) | 0.111   |
| <i>Model 2: adjusted for age and sex</i>                                                            |                  |         |
| No shift work at either survey                                                                      | Ref.             | Ref.    |
| Shift work at 1 <sup>st</sup> survey only                                                           | 1.18 (0.60-2.33) | 0.627   |
| Shift work at 2 <sup>nd</sup> survey only                                                           | 0.67 (0.31-1.44) | 0.307   |
| Shift work at both surveys                                                                          | 0.77 (0.45-1.31) | 0.327   |
| <i>Model 3: adjusted for age, sex, and CHARGE-AF risk model</i>                                     |                  |         |
| No shift work at either survey                                                                      | Ref.             | Ref.    |
| Shift work at 1 <sup>st</sup> survey only                                                           | 1.10 (0.56-2.18) | 0.780   |
| Shift work at 2 <sup>nd</sup> survey only                                                           | 0.69 (0.32-1.48) | 0.344   |
| Shift work at both surveys                                                                          | 0.76 (0.44-1.33) | 0.342   |
| <i>Model 4: adjusted for age, sex, CHARGE-AF risk model, education level, and physical activity</i> |                  |         |
| No shift work at either survey                                                                      | Ref.             | Ref.    |
| Shift work at 1 <sup>st</sup> survey only                                                           | 1.10 (0.56-2.19) | 0.780   |
| Shift work at 2 <sup>nd</sup> survey only                                                           | 0.72 (0.34-1.55) | 0.404   |
| Shift work at both surveys                                                                          | 0.81 (0.47-1.42) | 0.468   |
| <i>Model 5: adjusted for propensity score</i>                                                       |                  |         |
| No shift work at either survey                                                                      | Ref.             | Ref.    |
| Shift work at 1 <sup>st</sup> survey only                                                           | 1.11 (0.56-2.19) | 0.764   |
| Shift work at 2 <sup>nd</sup> survey only                                                           | 0.52 (0.23-1.18) | 0.116   |
| Shift work at both surveys                                                                          | 0.90 (0.53-1.55) | 0.706   |

Hazard ratios and p-values represent the association between shift work status and 10-year incident AF (starting from the 2<sup>nd</sup> attended survey). Results are shown for participants with no shift work at either survey (reference group,  $n = 7731$ , number of AF cases = 135, crude incidence = 1.7%), with shift work at the 1<sup>st</sup> survey only ( $n = 670$ , number of AF cases = 9, crude incidence = 1.3%), with shift work at the 2<sup>nd</sup> survey only ( $n = 885$ , number of AF cases = 7, crude incidence = 0.8%), and with shift work at both surveys ( $n = 1306$ , number of AF cases = 15, crude incidence = 1.1%). Components of the CHARGE-AF risk model were weight, height, systolic and diastolic blood pressure, antihypertensive drug use, diabetes, smoking, and history of myocardial infarction. AF, atrial fibrillation; CI, confidence interval; HR, hazard ratio.



**Table S6: Hazard ratios for the association of shift work with incident atrial fibrillation during extensive follow-up, with shift work included as a time-varying covariate. The Tromsø Study**

| Hazard ratio (95% confidence interval)                                                              | p-value |
|-----------------------------------------------------------------------------------------------------|---------|
| <i>Model 1: unadjusted</i>                                                                          |         |
| 0.70 (0.59-0.84)                                                                                    | <0.001  |
| <i>Model 2: adjusted for age and sex</i>                                                            |         |
| 0.98 (0.82-1.16)                                                                                    | 0.779   |
| <i>Model 3: adjusted for age, sex, and CHARGE-AF risk model</i>                                     |         |
| 0.94 (0.79-1.12)                                                                                    | 0.482   |
| <i>Model 4: adjusted for age, sex, CHARGE-AF risk model, education level, and physical activity</i> |         |
| 0.93 (0.78-1.12)                                                                                    | 0.455   |

Hazard ratios and p-values represent the association of shift work (included as time-varying covariate) with incident AF during extensive follow-up ( $n = 1244$ ) in the total study population ( $n = 22\,339$ ). In order to account for changes in paid work status after baseline, paid work (included as time-varying covariate) was included in all models. Components of the CHARGE-AF risk model were weight, height, systolic and diastolic blood pressure, antihypertensive drug use, diabetes, smoking, and history of myocardial infarction. AF, atrial fibrillation.

**Table S7: Hazard ratios for the association between shift work status at the 1<sup>st</sup> and 2<sup>nd</sup> attended survey and incident atrial fibrillation during extensive follow-up. The Tromsø Study**

| Determinant                                                                                         | HR (95% CI)      | p-value |
|-----------------------------------------------------------------------------------------------------|------------------|---------|
| <i>Model 1: unadjusted</i>                                                                          |                  |         |
| No shift work at either survey                                                                      | Ref.             | Ref.    |
| Shift work at 1 <sup>st</sup> survey only                                                           | 0.74 (0.49-1.10) | 0.138   |
| Shift work at 2 <sup>nd</sup> survey only                                                           | 0.60 (0.42-0.84) | 0.003   |
| Shift work at both surveys                                                                          | 0.94 (0.74-1.20) | 0.623   |
| <i>Model 2: adjusted for age and sex</i>                                                            |                  |         |
| No shift work at either survey                                                                      | Ref.             | Ref.    |
| Shift work at 1 <sup>st</sup> survey only                                                           | 1.07 (0.71-1.60) | 0.755   |
| Shift work at 2 <sup>nd</sup> survey only                                                           | 0.83 (0.59-1.17) | 0.294   |
| Shift work at both surveys                                                                          | 1.07 (0.84-1.35) | 0.604   |
| <i>Model 3: adjusted for age, sex, and CHARGE-AF risk model</i>                                     |                  |         |
| No shift work at either survey                                                                      | Ref.             | Ref.    |
| Shift work at 1 <sup>st</sup> survey only                                                           | 0.95 (0.63-1.44) | 0.807   |
| Shift work at 2 <sup>nd</sup> survey only                                                           | 0.80 (0.56-1.14) | 0.223   |
| Shift work at both surveys                                                                          | 1.07 (0.84-1.37) | 0.570   |
| <i>Model 4: adjusted for age, sex, CHARGE-AF risk model, education level, and physical activity</i> |                  |         |
| No shift work at either survey                                                                      | Ref.             | Ref.    |
| Shift work at 1 <sup>st</sup> survey only                                                           | 0.94 (0.62-1.42) | 0.752   |
| Shift work at 2 <sup>nd</sup> survey only                                                           | 0.81 (0.57-1.16) | 0.248   |
| Shift work at both surveys                                                                          | 1.08 (0.85-1.38) | 0.538   |
| <i>Model 5: adjusted for propensity score</i>                                                       |                  |         |
| No shift work at either survey                                                                      | Ref.             | Ref.    |
| Shift work at 1 <sup>st</sup> survey only                                                           | 0.89 (0.59-1.34) | 0.567   |
| Shift work at 2 <sup>nd</sup> survey only                                                           | 0.72 (0.51-1.02) | 0.063   |
| Shift work at both surveys                                                                          | 1.18 (0.93-1.50) | 0.180   |

Hazard ratios and p-values represent the association between shift work status and incident AF during extensive follow-up (starting from the 2<sup>nd</sup> attended survey). Results are shown for participants with no shift work at either survey (reference group, n = 7731, number of AF cases = 482, crude incidence = 6.2%), with shift work at the 1<sup>st</sup> survey only (n = 670, number of AF cases = 25, crude incidence = 3.7%), with shift work at the 2<sup>nd</sup> survey only (n = 885, number of AF cases = 35, crude incidence = 4.0%) and with shift work at both surveys (n = 1306, number of AF cases = 79, crude incidence = 6.0%). Components of the CHARGE-AF risk model were weight, height, systolic and diastolic blood pressure, antihypertensive drug use, diabetes, smoking, and history of myocardial infarction. AF, atrial fibrillation; CI, confidence interval; HR, hazard ratio.
